1 **An integrated approach unravels a crucial structural property for the function of the**  
2 **insect steroidogenic Halloween protein Noppera-bo**

3

4 Kotaro Koiwai<sup>a,1</sup>, Kazue Inaba<sup>a,b,1</sup>, Kana Morohashi<sup>b</sup>, Sora Enya<sup>b,2</sup>, Reina Arai<sup>b</sup>, Hirotatsu  
5 Kojima<sup>c</sup>, Takayoshi Okabe<sup>c</sup>, Yuuta Fujikawa<sup>d</sup>, Hideshi Inoue<sup>d</sup>, Ryunosuke Yoshino<sup>e</sup>,  
6 Takatsugu Hirokawa<sup>f,g,h</sup>, Koichiro Kato<sup>i</sup>, Kaori Fukuzawa<sup>j</sup>, Yuko Shimada-Niwa<sup>k</sup>, Akira  
7 Nakamura<sup>l</sup>, Fumiaki Yumoto<sup>a</sup>, Toshiya Senda<sup>a,m,n</sup> and Ryusuke Niwa<sup>a,k,3</sup>

8

9 <sup>a</sup>Structural Biology Research Center, Photon Factory, Institute of Materials Structure Science, High  
10 Energy Accelerator Research Organization, 1-1 Oho, Tsukuba, Ibaraki 305-0801, Japan

11 <sup>b</sup>Graduate School of Life and Environmental Sciences, University of Tsukuba, 1-1-1 Tennoudai,  
12 Tsukuba, Ibaraki 305-8572, Japan

13 <sup>c</sup>Drug Discovery Initiative, The University of Tokyo, 7-3-1 Hongo, Bunkyo-ku, Tokyo 113-0033,  
14 Japan.

15 <sup>d</sup>School of Life Sciences, Tokyo University of Pharmacy and Life Sciences, 1432-1 Horinouchi,  
16 Hachioji, Tokyo 192-0392, Japan.

17 <sup>e</sup>Graduate School of Comprehensive Human Sciences Majors of Medical Sciences, University of  
18 Tsukuba, 1-1-1 Tennoudai, Tsukuba, Ibaraki 305-8575, Japan

19 <sup>f</sup>Transborder Medical Research Center, University of Tsukuba, 1-1-1 Tennoudai, Tsukuba, Ibaraki  
20 305-8575, Japan

21 <sup>g</sup>Division of Biomedical Science, Faculty of Medicine, University of Tsukuba, 1-1-1 Tennoudai,  
22 Tsukuba Ibaraki 305-8575, Japan

23 <sup>h</sup>Molecular Profiling Research Center for Drug Discovery, National Institute of Advanced Industrial  
24 Science and Technology, 2-4-7 Aomi, Koto-ku, Tokyo 135-0064, Japan

25 <sup>i</sup>Mizuho Information & Research Institute, Inc., 2-3 Kanda Nishiki-cho, Chiyoda-ku, Tokyo, 101-  
26 8443

27 <sup>j</sup>School of Pharmacy and Pharmaceutical Sciences, Hoshi University, 2-4-41 Ebara, Shinagawa-ku,  
28 Tokyo 142-8501, Japan

29 <sup>k</sup>Life Science Center for Survival Dynamics, Tsukuba Advanced Research Alliance (TARA),  
30 University of Tsukuba, 1-1-1 Tennoudai, Tsukuba, Ibaraki 305-8577, Japan

31 <sup>l</sup>Institute of Molecular Embryology and Genetics, Kumamoto University, 2-2-1 Honjo, Chuo-ku,  
32 Kumamoto 860-0811, Japan

33 <sup>m</sup>School of High Energy Accelerator Science, SOKENDAI University, 1-1 Oho, Tsukuba, Ibaraki  
34 305-0801, Japan

35 <sup>n</sup>Faculty of Pure and Applied Sciences, University of Tsukuba, 1-1-1 Tennoudai, Ibaraki 305-8571,  
36 Japan

37

38 <sup>1</sup> These authors equally contributed to this work.

39 <sup>2</sup> Present Address: Department of Environmental Parasitology, Graduate School of Medical  
40 and Dental, Sciences, Tokyo Medical and Dental University, 1-5-45 Yushima, Bunkyo-ku  
41 Tokyo 113-8519, Japan.

42 <sup>3</sup> Corresponding Author: Ryusuke Niwa, Life Science Center for Survival Dynamics, Tsukuba  
43 Advanced Research Alliance (TARA), University of Tsukuba, Tennoudai 1-1-1, Tsukuba,  
44 Ibaraki 305-8577, Japan, +81-29-853-7342, ryusuke-niwa@tara.tsukuba.ac.jp

45

## 46 **Abstract**

47 Ecdysteroids are the principal insect steroid hormones essential for insect development and  
48 physiology. In the last 18 years, several enzymes responsible for ecdysteroid biosynthesis,  
49 encoded by Halloween genes, have been identified and well characterized, both genetically  
50 and biochemically. However, none of these proteins have yet been characterized at the  
51 tertiary structure level. Here, we report an integrated *in silico*, *in vitro*, and *in vivo* analyses of  
52 the Halloween glutathione *S*-transferase (GST) protein, Noppera-bo (Nobo). We determine  
53 crystal structures of *Drosophila melanogaster* Nobo (DmNobo) complexed with glutathione  
54 and 17 $\beta$ -estradiol, a DmNobo inhibitor. 17 $\beta$ -estradiol almost fully occupied the putative  
55 ligand-binding pocket, and a prominent hydrogen bond formed between Asp113 of DmNobo  
56 and 17 $\beta$ -estradiol. Asp113 is essential for inhibiting DmNobo enzymatic activity by 17 $\beta$ -  
57 estradiol, as 17 $\beta$ -estradiol does not inhibit and physically interacts less with the Asp113Ala  
58 DmNobo point mutant. Asp113 is highly conserved among Nobo proteins, but not among  
59 other GSTs, implying that Asp113 is important for endogenous Nobo function. Indeed, a  
60 homozygous *nobo* allele possessing the Asp113Ala point mutation exhibits embryonic  
61 lethality with undifferentiated cuticle structure, a phenocopy of complete loss-of-function  
62 *nobo* homozygotes. These results suggest that the *nobo* family of GST proteins has acquired a  
63 unique amino acid residue, which seems to be essential for binding an endogenous sterol  
64 substrate to regulate ecdysteroid biosynthesis. This is the first study to reveal the structural  
65 characteristics of insect steroidogenic Halloween proteins. This study also provides basic  
66 insight into applied entomology for developing a new type of insecticides that specifically  
67 inhibit ecdysteroid biosynthesis.

68

## 69 **Keywords**

70 crystal structure; *Drosophila melanogaster*; ecdysone; ecdysteroid; 17 $\beta$ -estradiol; fragment  
71 molecular orbital calculation; glutathione; glutathione *S*-transferase; insecticide; molecular  
72 dynamics simulation

## 73 **Significance Statement**

74 Insect molting and metamorphosis are drastic and dynamic biological processes and,  
75 therefore, have fascinated many scientists. Ecdysteroids represent one class of insect  
76 hormones that are indispensable for inducing molting and metamorphosis. It is well known  
77 that proteins responsible for catalyzing ecdysteroid biosynthesis reactions are encoded by  
78 “Halloween” genes, most of which have names of ghosts and phantoms. However, no studies  
79 have focused on the structural properties of these biosynthetic proteins. In this study, we  
80 addressed this unsolved issue and successfully unraveled a structural property that is crucial  
81 for the function of the fruit fly Halloween protein, Noppera-bo (a Japanese faceless ghost).  
82 This is the first study to reveal the structural characteristics of an insect steroidogenic  
83 Halloween protein.

84

## 85 **Introduction**

86 Ecdysteroids play pivotal roles in regulating many aspects of development and physiology in  
87 arthropods, including insects (1, 2). Because ecdysteroids do not exist naturally in animals  
88 other than arthropods, it has been long thought that molecules involved in ecdysteroid  
89 biosynthesis, secretion, circulation and reception could be good targets for developing third-  
90 generation pesticides that specifically inhibit insect life cycles, with no adverse effects on  
91 other animals (3). Thus, the study of ecdysteroids has been important, not only in the basic  
92 biological sciences, but also in the field of applied agrobiolgy.

93 Ecdysteroids are biosynthesized from dietary sterols that are primarily obtained from  
94 food sources (1, 2). The formation of each biosynthetic intermediate going from dietary  
95 sterols to the biologically-active form of ecdysteroids, 20-hydroxyecdysone (20E), is  
96 catalyzed by a specific ecdysteroidogenic enzyme (2, 4). Since 2000, a series of these  
97 enzymes has been identified. These enzymes include Neverland (5, 6), Non-molting  
98 glossy/Shroud (7), Spook/CYP307A1 (8, 9), Spookier/CYP307A2 (9), CYP6T3 (10),  
99 Phantom/CYP306A1 (11, 12), Disembodied/CYP302A1 (13), Shadow/CYP315A1 (13), and  
100 Shade/CYP314A1 (14). A deficiency of genes encoding these enzymes results in  
101 developmental lethality. Particularly, in the fruit fly *Drosophila melanogaster*, complete loss-  
102 of-function mutants of *shroud*, *spook*, *phantom*, *disembodied*, *shade*, and *shadow*, which are  
103 often classified as Halloween mutants, commonly result in embryonic lethality with the loss  
104 of differentiated cuticle structures (15). To date, the functions of these enzymes have been  
105 characterized genetically and some of them have also been analyzed biochemically (2, 16).

106 However, none of these enzymes have yet been characterized at the tertiary structure level.

107 Here, we report the first crystal structure of an ecdysteroidogenic regulator encoded  
108 by the Halloween gene, *noppera-bo (nobo)* (17–19). *nobo* encodes a member of the epsilon  
109 class of cytosolic glutathione *S*-transferases (GST, EC 2.5.1.18; hereafter GSTEs) (20). In  
110 general, GSTs catalyze various reactions with an activated glutathione (GSH) molecule in the  
111 following 3 ways: GSH conjugation to a substrate, reduction of a substrate using GSH, and  
112 isomerization (21). Data from previous studies have demonstrated that *nobo* is specifically  
113 expressed in ecdysteroidogenic tissues, including the prothoracic gland and the adult ovary  
114 (17–19). In addition, loss-of-*nobo*-function mutations in *D. melanogaster* and *Bombyx mori*  
115 result in developmental lethality, which are well rescued by administering 20E (17–19).  
116 Consistent with the requirement of GSH for GST function, a defect in glutathione  
117 biosynthesis in *D. melanogaster* also leads to larval lethality, in part due to ecdysone  
118 deficiency (22). These data clearly indicate that the *nobo* family of GSTs is essential for  
119 ecdysteroid biosynthesis. However, besides GSH, an endogenous ligand and a catalytic  
120 reaction driven by Nobo have not been elucidated.

121 In this study, we utilized the vertebrate female sex hormone 17 $\beta$ -estradiol (EST, Fig.  
122 1A) as a molecular probe to gain insight into Nobo ligand recognition, based on our previous  
123 finding that EST inhibits the GSH-conjugation activity of *D. melanogaster* Nobo (DmNobo;  
124 also known as DmGSTe14) (23). We therefore considered the complex of DmNobo and EST  
125 to be an ideal target for elucidating a 3-dimensional structure of an ecdysteroidogenic  
126 Halloween protein and characterizing the interaction between DmNobo and its potent  
127 inhibitor. Moreover, we used an integrated, combined approach based on quantum chemical  
128 calculations, molecular dynamics (MD) simulations, biochemical and biophysical analyses,  
129 and molecular genetics. Consequently, we identified one DmNobo amino acid residue that is  
130 strongly conserved only in the *nobo* family of GSTs, which is crucial for DmNobo inhibition  
131 by EST and for the normal *in vivo* function of DmNobo during *D. melanogaster*  
132 embryogenesis.

133

## 134 **Results**

### 135 **Crystal structure of DmNobo**

136 The crystal structure of the apo-form of DmNobo (DmNobo\_Apo) was determined at 1.50-Å  
137 resolution by the molecular replacement method (SI Appendix, Fig. S1A, Table S1). DmNobo  
138 forms a polypeptide homodimer with a canonical GST fold, which has a well-conserved

139 GSH-binding site (G-site) and a hydrophobic substrate-binding pocket (H-site) adjacent to  
140 the G-site (21, 24). The crystal structures of the DmNobo\_GSH, DmNobo\_EST, and  
141 DmNobo\_EST-GSH complexes were also determined at resolutions of 1.75 Å, 1.58 Å, and  
142 1.55 Å, respectively (Fig. 1B, SI Appendix, Fig. S1B, Table S1). The crystal structures of the  
143 DmNobo\_EST and DmNobo\_EST-GSH complexes reproducibly showed clear electron  
144 densities for EST. GSH and EST binding did not affect the overall structure of DmNobo (SI  
145 Appendix, Fig. S1C); the root-mean-square deviation (RMSD) values for each pair among the  
146 four crystal structures were comparable with respect to the estimated coordinate errors (SI  
147 Appendix, Table S2).

148 GSH, a common substrate of GSTs (21, 24), was found in the G-site of DmNobo.  
149 Crystallographic analysis revealed that the position and conformation of GSH in DmNobo  
150 were essentially identical to those in other GSTEs (25–27). GSH is recognized by an  
151 intensive hydrogen bond network with Gln43, His55, Val57, Pro58, Asp69, Ser70, His71, and  
152 Ser107 in the G-site (SI Appendix, Fig. S2). The hydrogen bond interactions are similar to  
153 those found in other GSTE proteins (25–27). Moreover, these residues are well conserved  
154 among not only GSTEs but also the delta and theta classes of GSTs (hereafter GSTD proteins  
155 and GSTT proteins, respectively), which are closely related to GSTEs (SI Appendix, Fig. S3A  
156 and S3B) (20). Therefore, we conclude that the interaction between the G-site and GSH  
157 cannot account for the unique functional property of DmNobo, as compared to other  
158 GSTD/E/T proteins.

159

### 160 **Molecular mechanism of EST recognition by DmNobo**

161 EST was bound in the H-site, which has a hydrophobic character. The electron-density map  
162 clearly showed that the compound in the H-site was the intact EST molecule. The EST  
163 molecule had no chemical modifications, including reduction and S-glutathionylation. The H-  
164 site, of which volume is approximately 365 Å<sup>3</sup>, was mostly filled with the EST molecule,  
165 which has a volume of approximately 350 Å<sup>3</sup>, and no space was available to accommodate  
166 another compound in the H-site (SI Appendix, Fig. S4).

167 Of the 16 amino acid residues lining the H-site, Arg13, Ser14, Gln43, Ser118, Arg122,  
168 and Met212 do not have direct contacts with EST (SI Appendix, Table S3). The D-ring of  
169 EST is situated near the entrance of the H-site and exposed to the solvent. Only a few  
170 interactions are observed between the D-ring of EST and DmNobo (Fig. 2A, SI Appendix,  
171 Table S3). In contrast, the A-ring of EST is located deep inside of the H-site and makes  
172 intensive interactions with H-site residues (Fig. 2A, SI Appendix, Table S3). Ser14, Pro15,

173 Leu38, Phe39, and Phe110 form hydrophobic interactions with the A-ring of EST and are  
174 completely conserved among the Nobo proteins (Fig. 3A, Fig. 3B, Fig. 3C, *SI Appendix*,  
175 Table S3). The conservation of these residues among DmGSTD/E/T proteins are less than  
176 those among Nobo proteins (Fig. 3D, Fig. 3E, Fig. 3F, *SI Appendix*, Table S3). While Ser114,  
177 Met117, Ser118, Val121, Thr172, and Leu208, which form hydrophobic interactions with  
178 EST, are not conserved completely in the Nobo proteins, they show higher conservation than  
179 that found among DmGSTD/E/T proteins. These results suggest that the three-dimensional  
180 structure of the H-site, particularly near the A-ring of EST, is conserved in Nobo proteins and  
181 has different characteristics from DmGSTD/E/T proteins.

182 While the H-site has an overall hydrophobic character, there is one charged residue,  
183 Asp113, in the H-site. Asp113, which is nearly completely conserved in the Nobo proteins  
184 (see below), is located at the innermost region of the H-site and forms a hydrogen bond with  
185 a hydroxyl group on the C3 atom of EST. EST binding induces a rotation of the  $\chi_1$  angle of  
186 Asp113 by 25.4°, and O $\delta$  of Asp113 forms a hydrogen bond with O3 of EST (Fig. 2B). The  
187 carboxyl group of Asp appears to be ionized, as expected considering that its isoelectric point  
188 is approximately 3.6 and that crystallization in solution was achieved at a pH of 6.4. This is  
189 the only hydrogen bond found between EST and DmNobo and seems to be critical for EST  
190 binding.

191 To evaluate the contribution of the hydrogen bond to the interaction with EST, total  
192 interaction energies between EST fragments and DmNobo amino acid residues were  
193 calculated using the fragment molecular orbital (FMO) method, which can evaluate the inter-  
194 fragment interaction energy (IFIE) based on the quantum chemistry (28, 29). The FMO  
195 calculation classifies the IFIE into 4 energy categories, namely the electrostatic energy (ES),  
196 exchange-repulsion energy (EX), charge-transfer energy and higher-order mixed term  
197 (CT+mix), and dispersion energy (DI). The FMO calculation estimated that the ES  
198 represented approximately half of the total IFIE (-41.4 kcal/mol versus -82.4 kcal/mol; Fig.  
199 2C and *SI Appendix*, Table S4). The crystal structure suggested that the ES arises from the  
200 hydrogen bond between O $\delta$  of Asp113 and O3 of EST (*SI Appendix*, Table S4). These results  
201 suggested that Asp113 plays a critical role in interacting with EST.

202

### 203 **Asp113 in DmNobo is essential for EST binding**

204 The importance of the Asp113-EST hydrogen bond for EST binding was biochemically  
205 examined with a recombinant mutated DmNobo protein carrying Asp113Ala amino acid

206 substitution (DmNobo[Asp113Ala]). DmNobo[Asp113Ala] lacks the sidechain carboxyl  
207 group at position 113 and therefore cannot form a hydrogen bond with EST. The crystal  
208 structure of the DmNobo[Asp113Ala] did not show significant structural differences  
209 compared with the wild-type DmNobo (DmNobo[WT]) protein (SI *Appendix*, Fig. S5A, Fig.  
210 S5B).

211 We first examined the enzymatic activities of DmNobo[WT] and  
212 DmNobo[Asp113Ala] using an *in vitro* enzymatic assay system with the fluorogenic  
213 substrate 3,4-DNADCF (23). In this assay system, GSTs catalyze GSH conjugation to the  
214 non-fluorescent molecule, 3,4-DNADCF, giving rise to highly fluorescent product, 4-GS-3-  
215 NADCF. In the absence of EST, both DmNobo[WT] and DmNobo[Asp113Ala] showed  
216 GSH-conjugation activity (Fig. 4C). In the presence of EST, as expected from the EST-  
217 binding to the H-site, the enzymatic activity of DmNobo[WT] was inhibited with an IC<sub>50</sub>  
218 value of approximately 2.3 μM (Fig. 4A, Fig. 4C). In contrast, the enzymatic activity of  
219 DmNobo[Asp113Ala] was not inhibited by EST, even at a concentration of 25 μM (Fig. 4A,  
220 Fig. 4C).

221 We next measured the dissociation constant (*K<sub>d</sub>*) values between DmNobo and EST  
222 by performing surface plasmon-resonance (SPR) analysis. The *K<sub>d</sub>* values between  
223 DmNobo[WT] and EST in the presence or absence of GSH were 0.38 ± 0.02 μM and 0.48 ±  
224 0.10 μM, respectively (Fig. 4B, Fig. 4C). In contrast, it was barely possible to determine the  
225 *K<sub>d</sub>* value between DmNobo[Asp113Ala] and EST due to a weak interaction (Fig. 4B, Fig.  
226 4C), which was consistent with crystal structure analysis (SI *Appendix*, Fig. S5C). These  
227 results suggest that Asp113 is critical for interaction with EST.

228 We also employed MD simulations to confirm the contribution of Asp113 to the  
229 interaction with EST using DmNobo[WT] and DmNobo[Asp113Ala] as models. In these MD  
230 simulations, the initial structures of EST and the DmNobo proteins were defined based on  
231 data acquired from our crystallographic analyses (Fig. 4D). While simulating DmNobo[WT]  
232 for 100 nano seconds (ns), we found that the distance between Oδ of Asp113 and the  
233 hydroxyl group of EST was relatively constant (Fig. 4E and 4F, Movie 1, Movie 2). However,  
234 when simulating DmNobo[Asp113Ala], the distance between Ala113 and the hydroxyl group  
235 of EST increased over time, and EST moved from the initial position (Fig. 4E and 4F, Movie  
236 1, Movie 2). Among three independent MD simulations, the maximum RMSD value of EST  
237 in DmNobo[WT] was less than ~6.60 Å (SI *Appendix*, Fig. S6A, Fig. S6B). In contrast, with  
238 the MD simulation of DmNobo[Asp113Ala], the maximum RMSD value was less than ~9.54



239 Å (SI Appendix, Fig. S6A, Fig. S6B). These simulation results also support the possibility that  
240 hydrogen bonding between Asp113 and EST is required for stable binding of EST to the H-  
241 site.

242

### 243 **Evolutionary conservation of Asp113 in Noppera-bo**

244 Previous reports have demonstrated that the *nobo* family of GSTs is found in Diptera and  
245 Lepidoptera (18, 30, 31). Amino acid-sequence analysis revealed that all Nobo proteins from  
246 6 dipteran and 13 lepidopteran species have Asp at the position corresponding to Asp113 of  
247 DmNobo (Fig. 3A, Fig. 3B, Fig. 3D). An exception is found in Nobo of the yellow fever  
248 mosquito *Aedes aegypti*, as the corresponding amino acid residue of *A. aegypti* Nobo is Glu,  
249 which also has a carboxyl group in the sidechain similar to Asp. In contrast, no Asp/Glu  
250 residue was found at the corresponding position of the DmGSTD/E/T proteins, other than  
251 Nobo (Fig. 3C, Fig. 3E, Fig. 3F). Consistent with the amino acid composition, EST did not  
252 inhibit the enzymatic activity of the DmGSTE6 or DmGSTE9 recombinant proteins (Fig. 3G).  
253 These results suggest that Nobo proteins utilize Asp113 to recognize their target compounds  
254 as a common feature and that Asp113 serves a biological role.

255

### 256 **Asp113 is essential for *Drosophila melanogaster* embryogenesis**

257 Finally, we examined whether Asp113 is essential for any *in vivo* biological function of  
258 DmNobo. We utilized a CRISPR-Cas9-based knock-in strategy to generate a *nobo* allele  
259 encoding an Asp113Ala point mutation (*nobo*<sup>3×FLAG-HA-D113A</sup>). We found that no trans-  
260 heterozygous mutant *D. melanogaster* with *nobo*<sup>3×FLAG-HA-D113A</sup> and the complete loss-of-  
261 *nobo*-function allele (*nobo*<sup>KO</sup>) (18) survived to the adult stage (Table 1). By performing a  
262 detailed developmental-stage analysis, we identified no first-instar larvae or later-staged  
263 insects with the *nobo*<sup>3×FLAG-HA-D113A</sup>/*nobo*<sup>KO</sup> genotype. These results indicate that the  
264 *nobo*<sup>3×FLAG-HA-D113A</sup>/*nobo*<sup>KO</sup> genotype is embryonic lethal. We also found that *nobo*<sup>3×FLAG-HA-  
265 D113A</sup>/*nobo*<sup>KO</sup> embryos exhibit an undifferentiated cuticle phenotype (Fig. 5A, Fig. 5B) and a  
266 failure of head involution (Fig. 5C, Fig. 5D). These phenotypic characteristics were very  
267 similar to the feature of Halloween mutants, such as *nobo*<sup>KO</sup>/*nobo*<sup>KO</sup> homozygotes (18). We  
268 confirmed that the protein level of Nobo<sup>3×FLAG-HA-D113A</sup> was comparable to that of  
269 Nobo<sup>3×FLAG-HA-WT</sup> (Fig. 5E, Fig. 5F), suggesting that the phenotypes were due to loss of  
270 protein function, but not impaired gene expression. Taken together, these results show that  
271 Asp113 of DmNobo serves a biological function in normal development from the embryonic

272 stage to the adult stage.

273

## 274 **Discussion**

275 In this study, we employed an integrated experimental approach, involving *in silico*, *in vitro*,  
276 and *in vivo* analyses to unravel the structure–function relationship of the ecdysteroidogenic  
277 GST protein, Nobo. GSTs are widely expressed in all eukaryotes and are also massively  
278 duplicated and diversified (24). Among them, the *nobo* family of GST proteins is strictly  
279 required for ecdysteroid biosynthesis in insects. Importantly, the lethality of *nobo* mutation in  
280 *D. melanogaster* is rescued by overexpressing *nobo* orthologues, but not by overexpressing  
281 non-*nobo*-type *gst* genes involved in detoxification and pigment synthesis (18). This fact  
282 strongly indicates that, when compared to canonical GSTs, Nobo proteins must possess a  
283 unique structural property that make Nobo specialized for ecdysteroid biosynthesis.  
284 Regarding this point, this study is significant in that we found that the unique acidic amino  
285 acid, Asp/Glu113, is crucial for the *in vivo* function of Nobo. It should be noted that, besides  
286 Asp/Glu113, other amino acids constituting the H-sites are also highly conserved among 21  
287 Nobo proteins (Fig. 3A, Fig. 3B, Fig. 3D). These common features imply that the Nobo  
288 proteins might share an identical endogenous ligand for the H-site in the ecdysteroidogenic  
289 tissues among the species.

290 An endogenous ligand for Nobo remains a mystery. This study, however, provides  
291 some clues for considering candidates for an endogenous ligand. First, it is very likely that  
292 the ligand forms a hydrogen bond with the Oδ/Oε atom of Asp/Glu113, given that the *nobo*  
293 Asp113Ala point mutation was embryonic lethal and the complete loss-of-function *nobo*  
294 phenocopy in mutant *D. melanogaster*. Second, considering the complementary shape between  
295 the H-site and EST, it seems reasonable to predict that the endogenous ligand(s) is at least  
296 similar in shape to steroids. This prediction is also supported by the fact that Nobo acts in  
297 ecdysteroidogenic tissues where steroidal molecules are enriched. One steroid that possesses  
298 these features is cholesterol. Evidence from our previous study suggests that *nobo* may be  
299 involved in cholesterol transport and/or metabolism in ecdysteroidogenic tissues (17–19).  
300 Very interestingly, an MD simulation indeed predicted that cholesterol can stably bind to the  
301 H-site of DmNobo via a hydrogen bond between the hydroxyl group of cholesterol (C3  
302 position) and Asp113 of DmNobo (SI Appendix, Fig. S7). However, paradoxically, it seems  
303 that cholesterol contains no site for a chemical reaction with GSH by DmNobo. It is possible  
304 that Nobo might serve as a carrier for the ligand, possibly cholesterol, as several classes of

305 GSTs have been shown to exhibit “ligandin” function to carry and transport specific ligands  
306 in cells (32). Currently, we have failed in multiple attempts to detect DmNobo-cholesterol  
307 complexes via crystallographic analyses, and further experiments are needed for clarify any  
308 interaction between Nobo and cholesterol.

309 The activities of insect ecdysteroids can be disrupted *in vivo* using chemical agonists  
310 and antagonists of the ecdysone receptor, some of which are also utilized as insecticides (33).  
311 However, chemical compounds that specifically inhibit ecdysteroid biosynthesis are not  
312 available. This study provides the first structural information for guiding the development of  
313 efficient Nobo inhibitors, which might serve as seed compounds for new insecticides in the  
314 future. However, it should be noted that EST and estrogenic chemical compounds are often  
315 recognized as endocrine-disrupting chemicals that can dangerously influence the endocrine  
316 systems of wild animals (34). Therefore, while EST is a prominent inhibitor of Nobo, a  
317 practical compound that can be utilized as an actual insecticide must display no-estrogenic  
318 activity. To consider this problem, it is important to note a difference in the EST-recognition  
319 patterns between DmNobo and the mammalian estrogen receptor alpha (ER $\alpha$ ) protein (35–  
320 38). The details of the EST-ER $\alpha$  interaction were investigated using the crystal structures of  
321 human ER $\alpha$  in an EST-bound form (35, 39). In ER $\alpha$ , Glu353 interacts with the O3 atom of  
322 EST, Phe404 interacts with the A-ring of EST via a CH/ $\pi$  interaction, His524 interacts with  
323 the O17 atom of EST, and hydrophobic residues interact with the steroid nucleus. Each of  
324 these recognition patterns were found in DmNobo, except for a hydrogen bond with the O17  
325 atom of EST. Asp113 of DmNobo interacts with the O3 atom of EST as in the case of Glu353  
326 of ER $\alpha$ , and DmNobo utilizes a Cys residue of GSH for an SH/ $\pi$  interaction with the A-ring  
327 of EST. However, no interaction was found between O17 of EST and residues of the H-site of  
328 DmNobo (SI Appendix, Fig. S8). Given this difference, we expect that a Nobo-specific, non-  
329 estrogenic chemical compound can be developed. Currently, we are pursuing large-scale  
330 computational calculations to select chemical compounds that satisfy those conditions and an  
331 *in vitro* enzymatic assay to examine DmNobo inhibition.

332 We emphasize that this report is the first to describe the physical interactions between  
333 a Halloween protein and a potent inhibitor at the atomic level. Our interdisciplinary approach  
334 will also be applicable for Nobo proteins other than *D. melanogaster*, such as disease vector  
335 mosquitos and the agricultural pest moths, and might be a viable strategy for developing new  
336 insecticides useful for human societies.

337

## 338 **Materials and Methods**

339 Additional methods are presented in the *SI Appendix*.

340

### 341 **Protein expression, purification, and *in vitro* enzymatic analysis**

342 Recombinant DmNobo was expressed with the pCold-III plasmid vector (TaKaRa Bio) in  
343 *Escherichia coli* strain BL21(DE3) (Promega) and purified via glutathione-affinity column  
344 chromatography, followed by size-exclusion column chromatography. *In vitro* GST assays  
345 and GST activity-inhibition assays using 3,4-DNADCF were performed as described  
346 previously (23).

347

### 348 **Crystallization**

349 DmNobo\_Apo crystals were obtained using a crystallization buffer containing 42.5% (v/v)  
350 polypropylene glycol 400 (PPG400) and 100 mM Bis-Tris (pH 6.4). Crystals of DmNobo-  
351 ligand complexes were prepared by the soaking method. DmNobo crystals were soaked for 6  
352 h in an artificial mother liquor (42.5% [w/v] PPG400 and 100 mM Bis-Tris [pH 6.4])  
353 containing 10 mM EST, with or without 1 mM GSH.

354

### 355 **Crystal structure determinations**

356 Crystals were scooped with a cryo-loop (MiTeGen) and flash frozen in liquid nitrogen.  
357 Diffraction data were collected at 100 K at beamlines BL-1A and BL-5A in the Photon  
358 Factory, Tsukuba, Japan, and at beamline X06SA in the Swiss Light Source, Villigen,  
359 Switzerland. The diffraction datasets were automatically processed and scaled using XDS  
360 (40), POINTLESS (41), and AIMLESS (42) on PReMo (43). The crystallographic statistics  
361 are summarized in *SI Appendix*, Table S1. Phases for the DmNobo\_Apo\_1 crystal were  
362 determined by the molecular replacement method with MOLREP (44) using DmGSTE7  
363 (PDB ID = 4PNG) as an initial model. Molecular replacement calculations for the other  
364 structures were performed using DmNobo\_Apo\_1 as an initial model. Crystallographic  
365 refinements were carried out using REFMAC5 and PHENIX.REFINE (45, 46). Models were  
366 manually built by COOT (47). The volume of the H-site of DmNobo was calculated using 3V  
367 (48). All molecular graphics presented in this manuscript were prepared with the PyMOL  
368 Molecular Graphics System, version 1.7.6 (Schrödinger, LLC).

369

### 370 **SPR assay**

371 *K<sub>d</sub>* values were determined by SPR using a Biacore T200 instrument and a CM5 sensorchip  
372 (GE Healthcare) at 25°C. DmNobo[WT] or DmNobo[Asp113Ala] was used as a ligand, and  
373 EST was used as an analyte in a buffer containing phosphate buffered saline (PBS) (10 mM  
374 KH<sub>2</sub>PO<sub>4</sub>-Na<sub>2</sub>HPO<sub>4</sub>, pH 7.4, 137 mM NaCl, and 2.7 mM KCl) with 1% dimethyl sulfoxide  
375 (DMSO) in the presence or absence of 1 mM GSH as a running buffer. The *K<sub>d</sub>* values of the  
376 ligands and analyte were evaluated with Biacore T200 Evaluation Software from triplicate  
377 assays.

378

### 379 **FMO calculations**

380 *Ab initio* FMO calculations (49–51) were performed with the DmNobo crystal structures.  
381 First, hydrogen atoms were added to the crystal structures, and their energy minimizations  
382 were performed. IFIEs were then calculated by the FMO method at the MP2/6-31G\* level for  
383 the energy-minimized DmNobo models that were fragmented into amino acid and ligand  
384 (EST) units. The obtained IFIEs were decomposed into four energy components (the ES, EX,  
385 CT+mix, and DI components) using paired interaction-energy decomposition analysis  
386 (PIEDA) (28, 29).

387

### 388 **MD simulations**

389 The structures of DmNobo[WT]\_EST-GSH and DmNobo[Asp113Ala]\_EST-GSH were  
390 processed to assign bond orders and hydrogenation. The ionization states of EST and GSH  
391 suitable for pH 7.0 ± 2.0 were predicted using Epik (52), and H-bond optimization was  
392 conducted using PROPKA (53). Energy minimization was performed in Maestro using the  
393 OPLS3 force field (54). Preparation for MD simulation was conducted using the Molecular  
394 Dynamics System Setup Module of Maestro (Schrödinger). DmNobo[WT]\_EST-GSH and  
395 DmNobo[Asp113Ala]\_EST-GSH, which were subjected to energy minimization, were placed  
396 in an orthorhombic box with a buffer distance of 10 Å to create a hydration model, using the  
397 TIP3P water model (55). NaCl (0.15 M) was added as the counterion to neutralize the system.  
398 The MD simulations were performed using Desmond ver. 2.3 (Schrödinger) (56). The cut-off  
399 radii for the van der Waals and electrostatic interactions, and the time step, initial temperature,  
400 and pressure of the system were set to 9 Å, 2.0 fs, 300 K, and 1.01325 bar, respectively. The  
401 sampling interval during the simulation was set to 10 ps. Finally, we performed MD  
402 simulations with the NPT ensemble for 100 ns.

403

#### 404 **Phylogenetic analysis**

405 Twenty one amino acid sequences of DmNobo or *Bombyx mori* Nobo orthologues were  
406 obtained from NCBI non-redundant protein database (57) and the Uniprot Knowledgebase  
407 (58).

408 For the phylogenetic analysis of insect GSTD/E/T proteins, previously described  
409 amino acid sequences were obtained from the Uniprot Knowledgebase, NCBI protein  
410 database, MonarchBase (18, 58–60). Multiple alignment of 503 amino acid sequences was  
411 performed with COBALT (61), and the sequence alignment was used for cluster-analysis  
412 with CLANS (62). A major cluster included 372 amino acid sequences of GSTD/E/T and  
413 other GST proteins (*SI Appendix*, Table S5). A phylogenetic tree was drawn with COBALT  
414 using the 372 GSTs with a neighbor-joining algorithm. We identified 371 sequences with a  
415 Grishin-sequence difference of 0.9, which included 151 GSTDs, 178 GSTEs, and 42 GSTTs.  
416 The GSTEs included 21 Nobo proteins. To calculate the amino acid frequencies, the obtained  
417 alignment was manually edited based on the known crystal structures, using Jalview (63).  
418 The amino acid frequencies were calculated and illustrated using WebLOGO version 3.7.4  
419 (64), and colored using the “Chemistry (AA)” scheme.

420

#### 421 **Transgenic *D. melanogaster* insects and genetics**

422 The generation of *D. melanogaster* knock-in flies was performed as described in the *SI*  
423 *materials*. We found that *nobo*<sup>3×FLAG-HA-WT</sup>-homozygous flies were fully viable, whereas  
424 *nobo*<sup>3×FLAG-HA-D113A</sup>-homozygous flies displayed embryonic lethality. We utilized *nobo*<sup>3×FLAG-</sup>  
425 *HA-D113A*-heterozygous and -homozygous embryos for cuticle preparation and immunostaining.  
426 To formally rule out the possibility that the embryonic lethality was due to anonymous  
427 deleterious mutations other than *nobo*<sup>3×FLAG-HA-D113A</sup>, we counted the number of trans-  
428 heterozygous flies with a *nobo* knock-out (*nobo*<sup>KO</sup>) from a previous report (18), as follows.  
429 Heterozygous *nobo*<sup>3×FLAG-HA-WT</sup>, *nobo*<sup>3×FLAG-HA-D113A</sup>, and *nobo*-knock-out (*nobo*<sup>KO</sup>) alleles  
430 were balanced with *CyO* carrying *Actin5C:gfp* cassette (*CyO-GFP*). Either *nobo*<sup>3×FLAG-HA-</sup>  
431 *WT/CyO-GFP* flies or *nobo*<sup>3×FLAG-A-D113A/CyO-GFP</sup> flies were crossed with *nobo*<sup>KO/CyO-GFP</sup>  
432 flies. The trans-heterozygous flies (*nobo*<sup>3×FLAG-HA-WT/nobo</sup><sup>KO</sup> or *nobo*<sup>3×FLAG-HA-D113A/nobo</sup><sup>KO</sup>)  
433 should exhibit no GFP signals. We found that GFP-negative *nobo*<sup>3×FLAG-HA-WT/nobo</sup><sup>KO</sup>  
434 embryos hatched normally and developed into adults without any abnormalities, whereas  
435 *nobo*<sup>3×FLAG-HA-D113A/nobo</sup><sup>KO</sup> embryos did not.

436

#### 437 **Cuticle preparation and immunostaining**

438 Embryonic cuticle preparation was performed as previously described (65). Immunostaining  
439 for whole-mount embryos was conducted as previously described (18). A mouse anti-FasIII  
440 monoclonal antibody 7G10 (Developmental Studies Hybridoma Bank, University of Iowa,  
441 USA; 1:20 dilution) and an anti-mouse IgG antibody conjugated with Alexa488 (Life  
442 Technologies; 1:200 dilution) were used for immunostaining the embryos. For  
443 immunostaining of the brain-ring gland complex in third-instar larvae, we first crossed  
444 *nobo*<sup>3×FLAG-HA-WT</sup> homozygous females or *nobo*<sup>3×FLAG-HA-D113A</sup>/*CyO-GFP* females with  
445 Oregon-R wild type males. Third-instar larvae of the heterozygous offspring (*nobo*<sup>3×FLAG-HA-  
446 WT/+</sup> or *nobo*<sup>3×FLAG-HA-D113A/+</sup>) were dissected and then immunostained as previously  
447 described (66). The antibodies used for the brain-ring gland complex included a rat anti-HA  
448 high-affinity monoclonal antibody (3F10, 1:20 dilution; Roche), a guinea pig anti-Shroud  
449 antibody (67) (1:200 dilution), an anti-rat IgG antibody conjugated with Alexa488 (1:200  
450 dilution; Life Technologies), and an anti-guinea pig IgG antibody conjugated with Alexa555  
451 (1:200 dilution; Life Technologies). Fluorescence images were obtained using an LSM700  
452 microscope (Carl Zeiss).

453

#### 454 **Acknowledgements**

455 We thank Teruki Honma and Chiduru Watanabe at RIKEN for discussions regarding the  
456 FMO calculations; Tamie Katsuta, Hiroyuki Matsumaru, and Ryuichi Kato for setting up  
457 crystal-screening conditions; Dr. Yusuke Yamada for managing the automated data collection  
458 at the Photon Factory; Ayaka Harada, Akira Shinoda, and Miki Senda for data collection at  
459 the Swiss Light Source; and the Developmental Studies Hybridoma Bank (University of  
460 Iowa) for providing us with antibodies. We are also grateful to Yoshiaki Nakagawa and  
461 Hajime Ono for their critical reading of the manuscript; and Tetsuo Nagano for his  
462 continuous encouragement and kind advice. We acknowledge the Paul Scherrer Institut  
463 (Villigen, Switzerland) for providing synchrotron radiation beamtime at beamline X06SA of  
464 the Swiss Light Source (proposal numbers 20181219 and 20181299). This work was  
465 supported in part by a KEK Postgraduate Research Student fellowship to K.I. This work was  
466 also supported by KAKENHI (grant numbers 15K14719 and 18K19163) to R.N. and by the  
467 Private University Research Branding Project. In addition, this work was supported by the  
468 Platform Project for Supporting in Drug Discovery and Life Science Research (Platform for  
469 Drug Discovery, Informatics, and Structural Life Science) and the Basis for Supporting  
470 Innovative Drug Discovery and Life Science Research from Japan Agency for Medical  
471 Research and Development (AMED) under Grant Number 18am0101113j0002. This work

472 was performed under the approval of the Photon Factory Program Advisory Committee  
473 (proposal number 2018G025).

474

#### 475 **Footnotes**

476 To whom correspondence may be addressed. Email: ryusuke-niwa@tara.tsukuba.ac.jp

477

478 Author contributions: K.Ko., K.I., Y.F., F.Y., T.S., and R.N. designed the research; K.Ko., K.I.,  
479 K.M., F.Y., and T.S. performed the X-ray crystallographic analysis; K.I., K.M., S.E., R.A.,  
480 H.K., T.O. Y.F., and H.I. performed the enzymatic assays and analyzed the data; K.Ko., K.I.,  
481 and R.A. performed the surface plasmon-resonance assays; R.Y. and T.H. performed MD  
482 simulations; K.Ka. and K.F. performed FMO calculations; R.A., Y.S.N., A.N. and R.N.  
483 performed experiments with the fruit flies; and K.Ko., K.I., R.Y., K.F., F.Y., T.S., and R.N.  
484 wrote the manuscript.

485

486 The authors declare no conflict of interest.

487

488 This article is a PNAS Direct Submission.

489

490 Data deposition: The X-ray data and coordinates presented in this paper were deposited in the  
491 Protein Data Bank (<https://pdbj.org/>) under the following PDB IDs: 6KEL, 6KEM, 6KEN,  
492 6KEO, 6KEP, 6KEQ, and 6KER.

493

#### 494 **References**

- 495 1. Yamanaka N, Rewitz KF, O'Connor MB (2013) Ecdysone Control of Developmental  
496 Transitions: Lessons from Drosophila Research. *Annu Rev Entomol* 58:497–516.
- 497 2. Niwa R, Niwa YS (2014) Enzymes for ecdysteroid biosynthesis: Their biological  
498 functions in insects and beyond. *Biosci Biotechnol Biochem* 78(8):1283–1292.
- 499 3. Williams CM (1967) Third-generation pesticides. *Sci Am* 217(1):13–17.
- 500 4. Gilbert LI (2004) Halloween genes encode P450 enzymes that mediate steroid  
501 hormone biosynthesis in *Drosophila melanogaster*. *Mol Cell Endocrinol* 215(1–2):1–  
502 10.
- 503 5. Yoshiyama T (2006) Neverland is an evolutionally conserved Rieske-domain protein  
504 that is essential for ecdysone synthesis and insect growth. *Development* 133(13):2565–  
505 2574.



- 506 6. Yoshiyama-Yanagawa T, et al. (2011) The conserved rieske oxygenase DAF-  
507 36/Neverland is a novel cholesterol-metabolizing enzyme. *J Biol Chem*  
508 286(29):25756–25762.
- 509 7. Niwa R, et al. (2010) Non-molting glossy/shroud encodes a short-chain  
510 dehydrogenase/reductase that functions in the “Black Box” of the ecdysteroid  
511 biosynthesis pathway. *Development* 137(12):1991–1999.
- 512 8. Namiki T, et al. (2005) Cytochrome P450 CYP307A1/Spook: A regulator for  
513 ecdysone synthesis in insects. *Biochem Biophys Res Commun* 337(1):367–374.
- 514 9. Ono H, et al. (2006) Spook and Spookier code for stage-specific components of the  
515 ecdysone biosynthetic pathway in Diptera. *Dev Biol* 298(2):555–570.
- 516 10. Ou Q, Magico A, King-Jones K (2011) Nuclear receptor DHR4 controls the timing of  
517 steroid hormone pulses during *Drosophila* development. *PLoS Biol* 9(9):e1001160.
- 518 11. Niwa R, et al. (2004) CYP306A1, a cytochrome P450 enzyme, is essential for  
519 ecdysteroid biosynthesis in the prothoracic glands of *Bombyx* and *Drosophila*. *J Biol*  
520 *Chem* 279(34):35942–35949.
- 521 12. Warren JT, et al. (2004) Phantom encodes the 25-hydroxylase of *Drosophila*  
522 *melanogaster* and *Bombyx mori*: A P450 enzyme critical in ecdysone biosynthesis.  
523 *Insect Biochem Mol Biol* 34(9):991–1010.
- 524 13. Warren JT, et al. (2002) Molecular and biochemical characterization of two P450  
525 enzymes in the ecdysteroidogenic pathway of *Drosophila melanogaster*. *Proc Natl*  
526 *Acad Sci* 99(17):11043–11048.
- 527 14. Petryk A, et al. (2003) Shade is the *Drosophila* P450 enzyme that mediates the  
528 hydroxylation of ecdysone to the steroid insect molting hormone 20-hydroxyecdysone.  
529 *Proc Natl Acad Sci* 100(24):13773–13778.
- 530 15. Chavez VM, et al. (2000) The *Drosophila* disembodied gene controls late embryonic  
531 morphogenesis and codes for a cytochrome P450 enzyme that regulates embryonic  
532 ecdysone levels. *Development* 127(19):4115–4126.
- 533 16. Saito J, Kimura R, Kaieda Y, Nishida R, Ono H (2016) Characterization of candidate  
534 intermediates in the Black Box of the ecdysone biosynthetic pathway in *Drosophila*  
535 *melanogaster*: Evaluation of molting activities on ecdysteroid-defective larvae. *J Insect*  
536 *Physiol* 93–94:94–104.
- 537 17. Chanut-Delalande H, et al. (2014) Pri peptides are mediators of ecdysone for the  
538 temporal control of development. *Nat Cell Biol* 16(11):1035–1044.
- 539 18. Enya S, et al. (2014) A Halloween gene noppera-bo encodes a glutathione S-

- 540 transferase essential for ecdysteroid biosynthesis via regulating the behaviour of  
541 cholesterol in *Drosophila*. *Sci Rep* 4:6586.
- 542 19. Enya S, et al. (2015) The silkworm glutathione S-transferase gene *noppera-bo* is  
543 required for ecdysteroid biosynthesis and larval development. *Insect Biochem Mol Biol*  
544 61:1–7.
- 545 20. Saisawang C, Wongsantichon J, Ketterman AJ (2012) A preliminary characterization  
546 of the cytosolic glutathione transferase proteome from *Drosophila melanogaster*.  
547 *Biochem J* 442(1):181–190.
- 548 21. Wu B, Dong D (2012) Human cytosolic glutathione transferases: Structure, function,  
549 and drug discovery. *Trends Pharmacol Sci* 33(12):656–668.
- 550 22. Enya S, et al. (2017) Dual Roles of Glutathione in Ecdysone Biosynthesis and  
551 Antioxidant Function During the Larval Development in *Drosophila*. *Genetics*  
552 207(4):1519–1532.
- 553 23. Fujikawa Y, et al. (2015) A practical fluorogenic substrate for high-throughput  
554 screening of glutathione S-transferase inhibitors. *Chem Commun* 51(57):11459–11462.
- 555 24. Mashiyama ST, et al. (2014) Large-Scale Determination of Sequence, Structure, and  
556 Function Relationships in Cytosolic Glutathione Transferases across the Biosphere.  
557 *PLoS Biol* 12(4):e1001843.
- 558 25. Scian M, et al. (2015) Comparison of epsilon- and delta-class glutathione S-  
559 transferases: The crystal structures of the glutathione S-transferases DmGSTe6 and  
560 DmGSTe7 from *Drosophila melanogaster*. *Acta Crystallogr Sect D Biol Crystallogr*  
561 71(Pt 10):2089–2098.
- 562 26. Low WY, et al. (2010) Recognition and detoxification of the insecticide DDT by  
563 *drosophila melanogaster* glutathione S-transferase D1. *J Mol Biol* 399(3):358–366.
- 564 27. Riveron JM, et al. (2014) A single mutation in the GSTe2 gene allows tracking of  
565 metabolically based insecticide resistance in a major malaria vector. *Genome Biol*  
566 15:R27.
- 567 28. Fedorov DG, Kitaura K (2007) Pair interaction energy decomposition analysis. *J*  
568 *Comput Chem* 28(1):222–237.
- 569 29. Tsukamoto T, et al. (2015) Implementation of Pair Interaction Energy  
570 Decomposition Analysis and Its Applications to Protein-Ligand Systems. *J Comput*  
571 *Chem Japan* 14(1):1–9.
- 572 30. Yu Q, et al. (2008) Identification, genomic organization and expression pattern of  
573 glutathione S-transferase in the silkworm, *Bombyx mori*. *Insect Biochem Mol Biol*

- 574 38(12):1158–1164.
- 575 31. Ayres CFJ, et al. (2011) Comparative genomics of the anopheline glutathione S-  
576 transferase epsilon cluster. *PLoS One* 6(12):e29237.
- 577 32. Simons PC, Vander Jagt DL (1980) Bilirubin binding to human liver ligandin  
578 (glutathione S-transferase). *J Biol Chem* 255(10):4740–4744.
- 579 33. Nakagawa Y, Henrich VC (2009) Arthropod nuclear receptors and their role in  
580 molting. *FEBS J* 276(21):6128–6157.
- 581 34. Pinto PIS, Estêvão MD, Power DM (2014) Effects of estrogens and estrogenic  
582 disrupting compounds on fish mineralized tissues. *Mar Drugs* 12(8):4474–4494.
- 583 35. Brzozowski AM, et al. (1997) Molecular basis of agonism and antagonism in the  
584 oestrogen receptor. *Nature* 389(6652):753–758.
- 585 36. Pike ACW, et al. (1999) Structure of the ligand-binding domain of oestrogen receptor  
586 beta in the presence of a partial agonist and a full antagonist. *EMBO J* 18(17):4608–  
587 4618.
- 588 37. Pedersen LC, Petrotchenko E, Shevtsov S, Negishi M (2002) Crystal Structure of the  
589 Human Estrogen Sulfotransferase-PAPS Complex. *J Biol Chem* 277(20):17928–17932.
- 590 38. Avvakumov G V., Grishkovskaya I, Muller YA, Hammond GL (2002) Crystal  
591 structure of human sex hormone-binding globulin in complex with 2-methoxyestradiol  
592 reveals the molecular basis for high affinity interactions with C-2 derivatives of  
593 estradiol. *J Biol Chem* 277(47):45219–45225.
- 594 39. Fukuzawa K, Mochizuki Y, Tanaka S, Kitaura K, Nakano T (2006) Molecular  
595 interactions between estrogen receptor and its ligand studied by the ab initio fragment  
596 molecular orbital method. *J Phys Chem B* 110(32):16102–16110.
- 597 40. Kabsch W (2010) Xds. *Acta Crystallogr Sect D Biol Crystallogr* 66(2):125–132.
- 598 41. Evans P (2006) Scaling and assessment of data quality. *Acta Crystallogr Sect D Biol*  
599 *Crystallogr* 62(1):72–82.
- 600 42. Evans PR, Murshudov GN (2013) How good are my data and what is the resolution?  
601 *Acta Crystallogr Sect D Biol Crystallogr* 69(7):1204–1214.
- 602 43. Yamada Y, et al. (2013) Data management system at the photon factory  
603 macromolecular crystallography beamline. *J Phys Conf Ser* 425(PART 1):0–4.
- 604 44. Vagin A, Teplyakov A (1997) *MOLREP*: an Automated Program for Molecular  
605 Replacement. *J Appl Crystallogr* 30(6):1022–1025.
- 606 45. Murshudov GN, Vagin AA, Dodson EJ (1997) Refinement of Macromolecular  
607 Structures by the Maximum-Likelihood Method. *Acta Crystallogr Sect D Biol*

- 608            *Crystallogr* 53(3):240–255.
- 609    46.    Afonine P V, et al. (2012) Towards automated crystallographic structure refinement  
610            with phenix.refine. *Acta Crystallogr D Biol Crystallogr* 68(Pt 4):352–367.
- 611    47.    Emsley P, Lohkamp B, Scott WG, Cowtan K (2010) Features and development of  
612            Coot. *Acta Crystallogr Sect D Biol Crystallogr* 66(4):486–501.
- 613    48.    Voss NR, Gerstein M (2010) 3V: Cavity, channel and cleft volume calculator and  
614            extractor. *Nucleic Acids Res* 38(SUPPL. 2):555–562.
- 615    49.    Fedorov D, Kitaura K (2009) *The Fragment Molecular Orbital Method* eds Fedorov D,  
616            Kitaura K (CRC Press, Taylor & Francis Group, 6000 Broken Sound Parkway NW,  
617            Suite 300, Boca Raton, FL 33487-2742) doi:10.1201/9781420078497.
- 618    50.    Fedorov DG, Nagata T, Kitaura K (2012) Exploring chemistry with the fragment  
619            molecular orbital method. *Phys Chem Chem Phys* 14(21):7562–7577.
- 620    51.    Tanaka S, Mochizuki Y, Komeiji Y, Okiyama Y, Fukuzawa K (2014) Electron-  
621            correlated fragment-molecular-orbital calculations for biomolecular and nano systems.  
622            *Phys Chem Chem Phys* 16(22):10310–10344.
- 623    52.    Shelley JC, et al. (2007) Epik: A software program for pKa prediction and protonation  
624            state generation for drug-like molecules. *J Comput Aided Mol Des* 21(12):681–691.
- 625    53.    Li H, Robertson AD, Jensen JH (2005) Very fast empirical prediction and  
626            rationalization of protein pK a values. *Proteins Struct Funct Genet* 61(4):704–721.
- 627    54.    Harder E, et al. (2016) OPLS3: A Force Field Providing Broad Coverage of Drug-like  
628            Small Molecules and Proteins. *J Chem Theory Comput* 12(1):281–296.
- 629    55.    Madura JD, Jorgensen WL, Chandrasekhar J, Klein ML, Impey RW (2003)  
630            Comparison of simple potential functions for simulating liquid water. *J Chem Phys*  
631            79(2):926–935.
- 632    56.    Dror RO, Dirks RM, Grossman JP, Xu H, Shaw DE (2012) Biomolecular Simulation:  
633            A Computational Microscope for Molecular Biology. *Annu Rev Biophys* 41:429–452.
- 634    57.    Altschul SF, et al. (1997) Gapped BLAST and PSI-BLAST: a new generation of  
635            protein database search programs. *Nucleic Acids Res* 25(17):3389–3402.
- 636    58.    Bateman A, et al. (2017) UniProt: The universal protein knowledgebase. *Nucleic Acids*  
637            *Res* 45(D1):D158–D169.
- 638    59.    Zhan S, Reppert SM (2013) MonarchBase: The monarch butterfly genome database.  
639            *Nucleic Acids Res* 41(D1):758–763.
- 640    60.    Agarwala R, et al. (2018) Database resources of the National Center for Biotechnology  
641            Information. *Nucleic Acids Res* 46(D1):D8–D13.

- 642 61. Papadopoulos JS, Agarwala R (2007) COBALT: Constraint-based alignment tool for  
643 multiple protein sequences. *Bioinformatics* 23(9):1073–1079.
- 644 62. Frickey T, Lupas A (2004) CLANS: A Java application for visualizing protein families  
645 based on pairwise similarity. *Bioinformatics* 20(18):3702–3704.
- 646 63. Waterhouse AM, Procter JB, Martin DMA, Clamp M, Barton GJ (2009) Jalview  
647 Version 2-A multiple sequence alignment editor and analysis workbench.  
648 *Bioinformatics* 25(9):1189–1191.
- 649 64. Crooks GE, Hon G, Chandonia JM, Brenner SE (2004) WebLogo: A sequence logo  
650 generator. *Genome Res* 14(6):1188–1190.
- 651 65. Wieschaus E, Nüsslein-Volhard C (1986) Looking at embryos. *Drosophila: A*  
652 *Practical Approach*, ed Roberts D. B (IRL Press, Oxford), pp 199–227.
- 653 66. Imura E, Yoshinari Y, Shimada-Niwa Y, Niwa R (2017) Protocols for Visualizing  
654 Steroidogenic Organs and Their Interactive Organs with Immunostaining in the Fruit  
655 Fly *Drosophila melanogaster*. *J Vis Exp* (122). doi:10.3791/55519.
- 656 67. Shimada-Niwa Y, Niwa R (2014) Serotonergic neurons respond to nutrients and  
657 regulate the timing of steroid hormone biosynthesis in *Drosophila*. *Nat Commun*  
658 5:5778.
- 659
- 660

## 661 **Figure Legends**

### 662 **Figure 1. Crystal structures of the *Drosophila melanogaster* Noppera-bo protein**

663 (A) Chemical structure of 17 $\beta$ -estradiol (EST). The atoms of the steroid nucleus are indicated.

664 Rings A, B, C, and D are also shown.

665 (B) Simulated annealing-omit map for GSH and EST in the DmNobo\_EST-GSH complex. A  
666 *mFo-DFc* map (blue) ( $4.0\sigma$ ) within 5.0 Å from the protein atoms is shown. Carbon atoms of  
667 DmNobo, GSH, and EST are colored green, wheat, and red, respectively. Oxygen and  
668 nitrogen atoms are colored green and blue, respectively.

669 (C) An enlarged view of (B) around the EST and GSH ligands

670

### 671 **Figure 2. Asp113 in the H-site interacts with 17 $\beta$ -estradiol.**

672 (A) GSH- and EST-interacting residues. Carbon atoms of the G- and H-sites are colored in  
673 green and blue, respectively. Common residues of the G- and H-sites (Ser14, Pro15, Leu38,  
674 Gln43, and Phe110) are assigned as those of the H-site in this figure. Carbon atoms in Ser14,  
675 Asp113, and ligands (GSH and EST) are colored in pink, red, and gray, respectively. A water  
676 molecule interacting with each ligand is represented with a yellow sphere.

677 (B) Conformational change of Asp113 upon ligand binding. Carbon atoms in DmNobo\_Apo,  
678 DmNobo\_GSH, DmNobo\_EST, and DmNobo\_EST-GSH are shown in blue, yellow, green,  
679 and red, respectively. A hydrogen bond between the O3 atom of EST and O $\delta$  in Asp113 is  
680 indicated by a dashed line. The difference in the  $\chi_1$  torsion angle of Asp113 between  
681 DmNobo\_GSH and DmNobo\_EST-GSH was 25.4°.

682 (C) Interaction energies between EST and other atoms in the DmNobo\_EST-GSH complex.  
683 The interaction energies were calculated from the PIEDA analysis, based on the FMO  
684 calculation. ES, EX, CT+mix, and DI indicate the electrostatic energy, exchange repulsion  
685 energy, charge transfer energy and higher order mixed term, and dispersion energy,  
686 respectively. Residues within a distance of twice the van der Waals radii from the EST atoms  
687 are shown. Numerical data for (C) are available in the *SI Appendix*, Table S4.

688

### 689 **Figure 3. Consensus amino acid residues in the H-sites of Nobo orthologues**

690 (A) Amino acid-sequence alignment of the H-site residues of 21 Nobo orthologues. These  
691 sequences were aligned using COBALT and manually edited, based on the crystal structure  
692 of DmNobo. The accession numbers of *Helicoverpa armigera*\_1 and \_2 are XP\_021192638.1  
693 and A0A2W1BRE1, respectively.

694 (B) Frequencies of amino acid residues forming the H-sites of 21 Nobo. The frequencies  
695 were calculated using LOGO.

696 (C) Conservation ratios of H-site residues among Nobo proteins are mapped to the tertiary  
697 structure of DmNobo.

698 (D) Amino acid-sequence alignment of the H-site residues of DmGSTE. Asp113 of DmNobo  
699 is colored in green.

700 (E) Frequencies of amino acid residues forming the H-sites of GSTD/E/T proteins. The  
701 frequencies were calculated using LOGO.

702 (F) Conservation ratios of H-site residues among GSTD/E/T proteins including Nobo  
703 proteins (SI Appendix, Fig. S3A, Table S2) are mapped to the tertiary structure of DmNobo.

704 (G) EST-dependent inhibition of the GSH-conjugation activities of DmNobo, DmGSTE6,  
705 and DmGSTE9. 3,4-DNADCF was used as an artificial fluorescent substrate. Each relative  
706 activity is defined as the ratio of activity, when compared to the respective proteins without  
707 EST. The error bars indicate the standard errors (SEM) from triplicate assays.

708

709 **Figure 4. Asp113 is essential for DmNobo binding to EST.**

710 (A) EST-dependent inhibition of the GSH-conjugation activity of DmNobo[WT] (cyan) and  
711 DmNobo[Asp113Ala] (red). 3,4-DNADCF was used as an artificial fluorescent substrate. In  
712 each case, the relative activity is defined as the ratio of activity, when compared to  
713 DmNobo[WT] without EST. The error bars indicate the standard errors (SEM) from triplicate  
714 assays.

715 (B) Sensorgrams of surface plasmon-resonance analysis of DmNobo proteins with EST.  
716 DmNobo[WT] or DmNobo[Asp113Ala] was immobilized to a sensor chip, and solutions  
717 containing a series of EST concentrations were applied in presence of 1 mM GSH.

718 (C) Kinetic parameters of DmNobo proteins. Catalytic activity (\*) and  $IC_{50}$  of EST (†)  
719 indicate 3,4-DNADCF-specific GSH-conjugation activity and the  $IC_{50}$  of EST against 3,4-  
720 DNADCF-specific GSH-conjugation activity, respectively. Values in parentheses indicate  
721 standard errors from triplicate assays (‡).

722 (D–F) *In silico* evaluation of the contribution of Asp113 to the interaction between DmNobo  
723 and EST. MD simulations of the DmNobo[WT] or DmNobo[Asp113Ala] complex with EST  
724 and GSH in a TIP3P-water model were carried out at 300 K for 100 ns. These simulations  
725 were performed in triplicate.

726 (D) MD models at 0 ns of DmNobo with EST and GSH (blue), DmNobo[Asp113Ala] with  
727 EST and GSH (magenta), and the crystal structure of DmNobo\_EST-GSH (EST-GSH\_Xtal,

728 gray). The upper models are shown from above the EST ligand, and the lower models are  
729 rotated 90° from the upper models. Hydrogen atoms are not shown.

730 (E) MD models of DmNobo[WT]\_EST-GSH and DmNobo[Asp113Ala]\_EST-GSH from  
731 72.6 ns to 90.0 ns

732 (F) Distance between O $\delta$  of Asp113 of DmNobo[WT] or C $\beta$  of DmNobo[Asp113Ala] and  
733 the O3 atom of EST at each frame.

734

735 **Figure 5. *in vivo* analyses of Asp113Ala**

736 (A, B) Dark-field images of embryonic cuticles from *nobo*<sup>3×FLAG-HA-D113A</sup> heterozygotes  
737 (*nobo*<sup>3×FLAG-HA-D113A</sup>/*CyO*; A) and homozygotes (*nobo*<sup>3×FLAG-HA-D113A</sup>/*nobo*<sup>3×FLAG-HA-D113A</sup>; B)

738 (C, D) Anti-FasIII antibody staining to visualize overall embryo morphologies. (C)

739 *nobo*<sup>3×FLAG-HA-D113A</sup> heterozygotes. (D) *nobo*<sup>3×FLAG-HA-D113A</sup> homozygotes. The bracket

740 indicates defective head involution.

741 (E, F) Immunohistochemistry for the ring glands from *nobo*<sup>3×FLAG-HA-D113</sup>-heterozygous (E)

742 and *nobo*<sup>3×FLAG-HA-D113A</sup>-heterozygous (F) third-instar larvae. Green and magenta represent the

743 immunostaining observed with anti-HA and anti-Shroud (Sro) antibodies, respectively. Sro

744 was detected as a marker of the prothoracic gland.

745 Scale bars: 100  $\mu$ m for A–D and 50  $\mu$ m for E and F



**A** bioRxiv preprint doi: <https://doi.org/10.1101/781070>; this version posted September 27, 2019. The copyright holder for this preprint (which was not certified by peer review) is the author/funder, who has granted bioRxiv a license to display the preprint in perpetuity. It is made available under aCC-BY-NC-ND 4.0 International license.

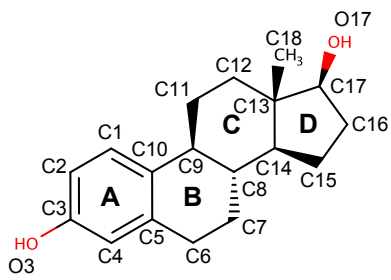

17β-Estradiol  
(EST)

**B** **C**

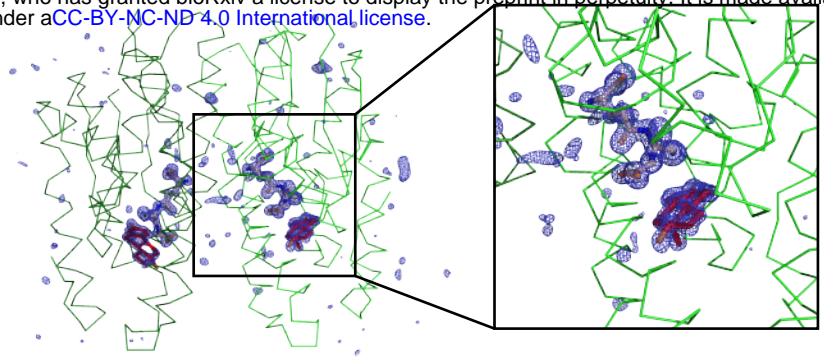

DmNobo\_EST-GSH

Figure 1 DmNobo\_EST-GSH structure

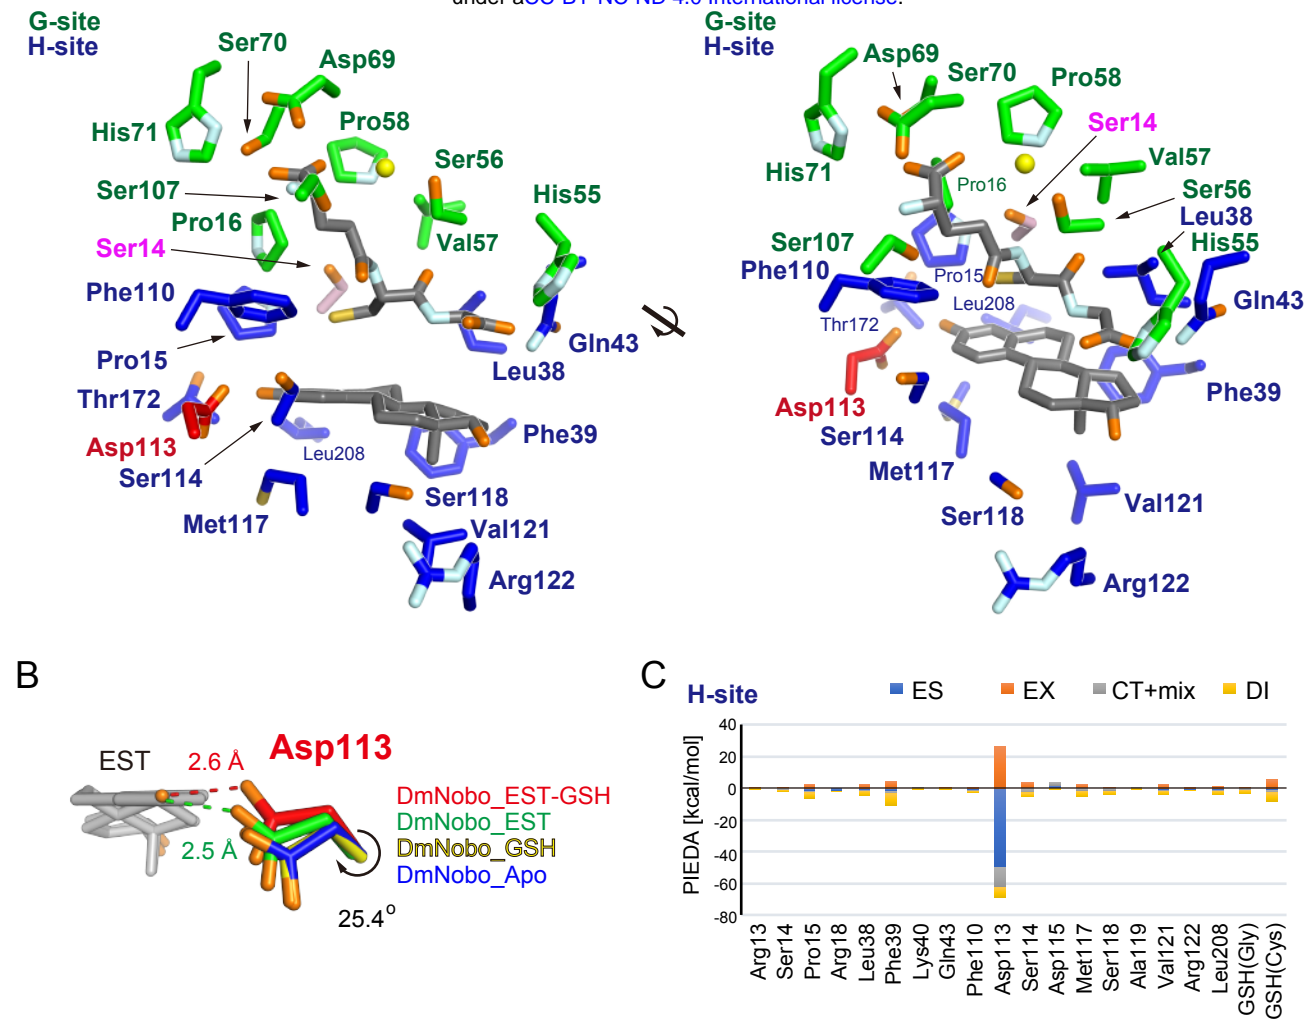

Figure 2 Asp113 interacts with EST

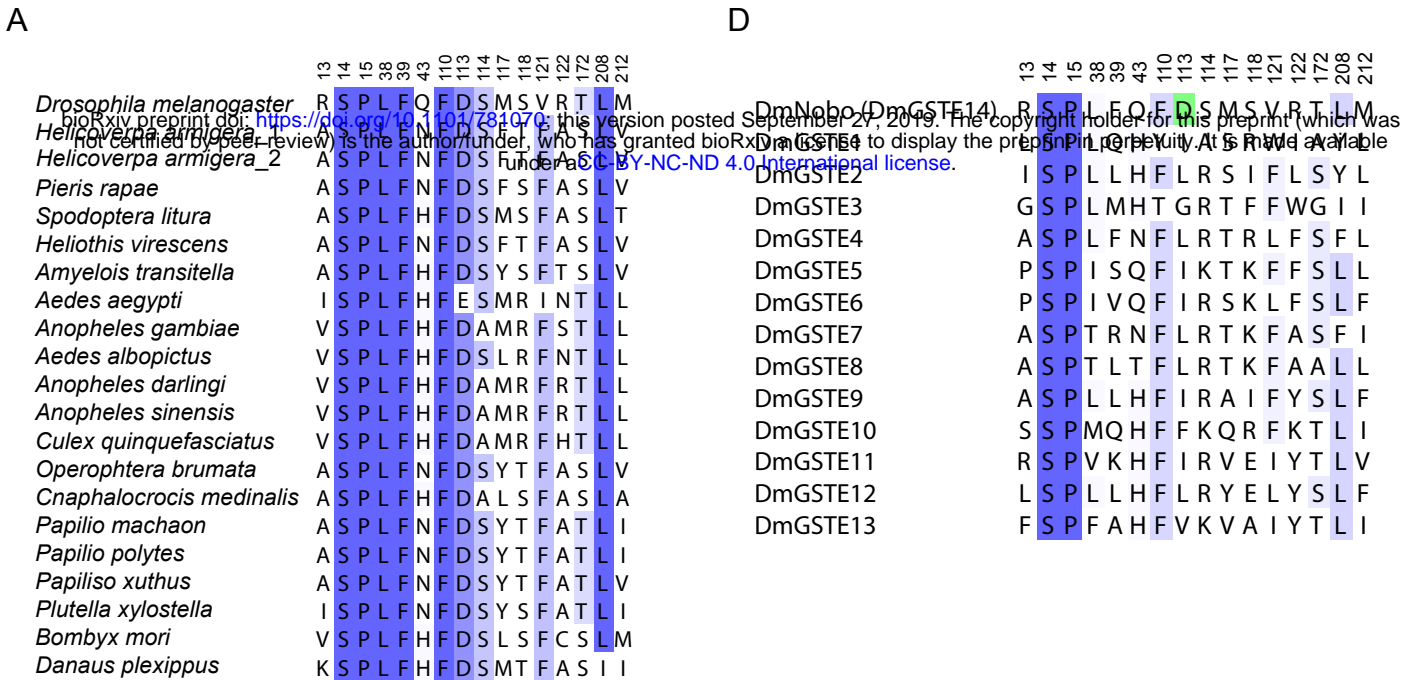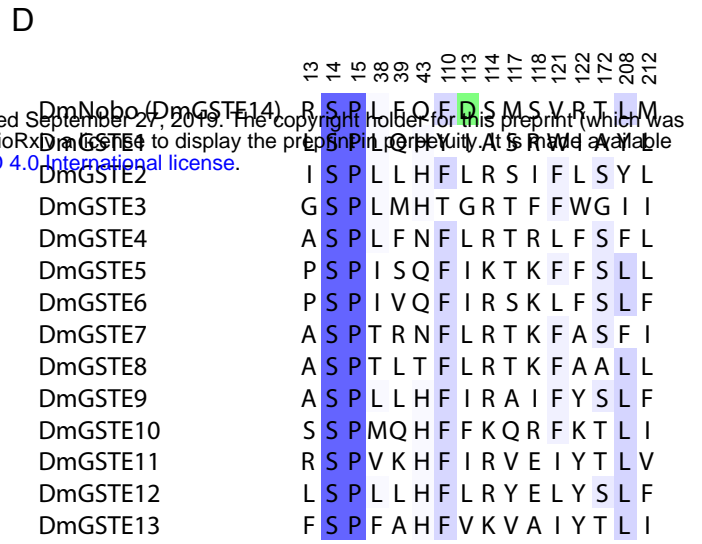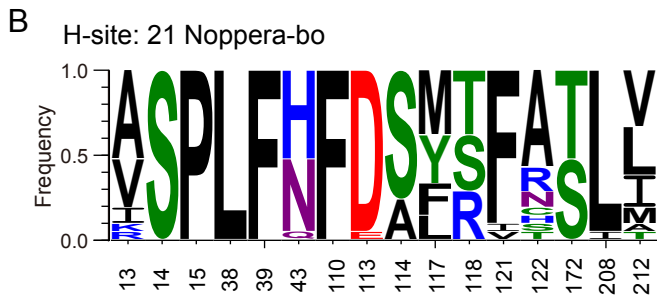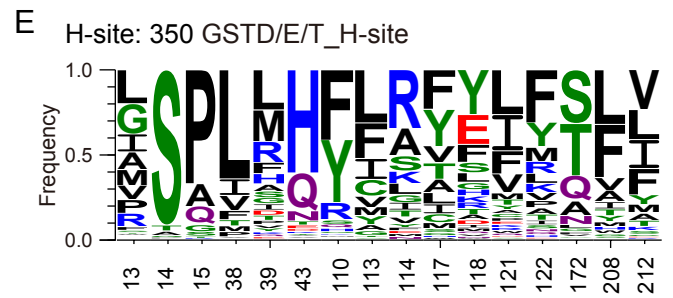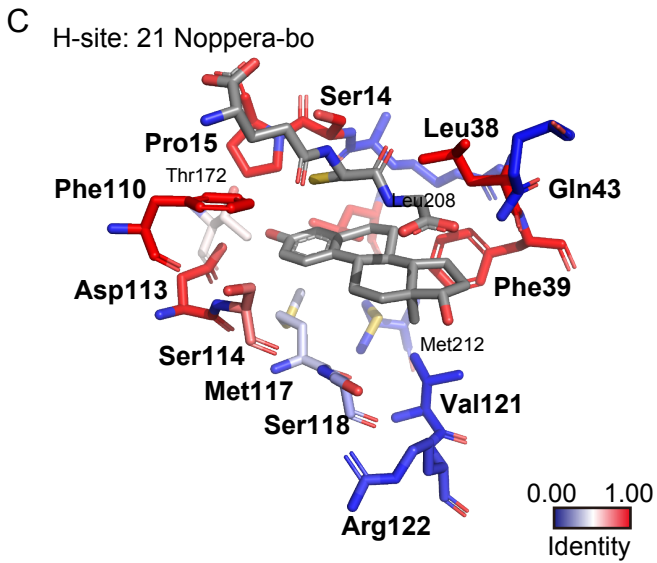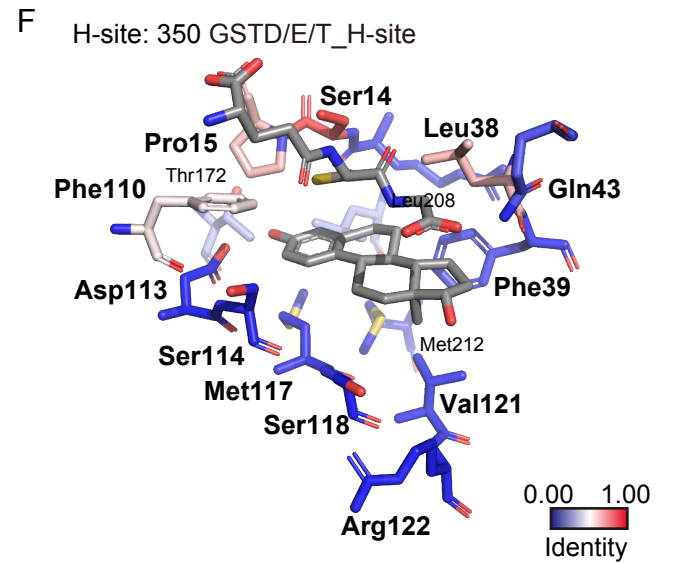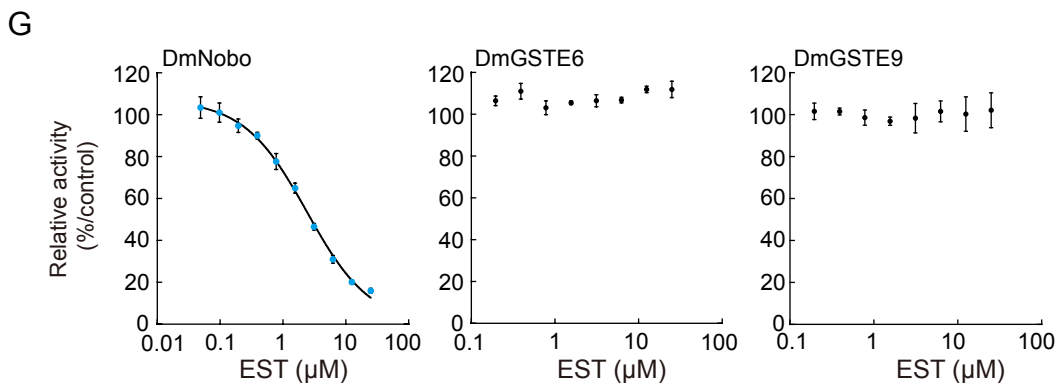

Figure 3 Asp113 is conserved among Noppera-bo

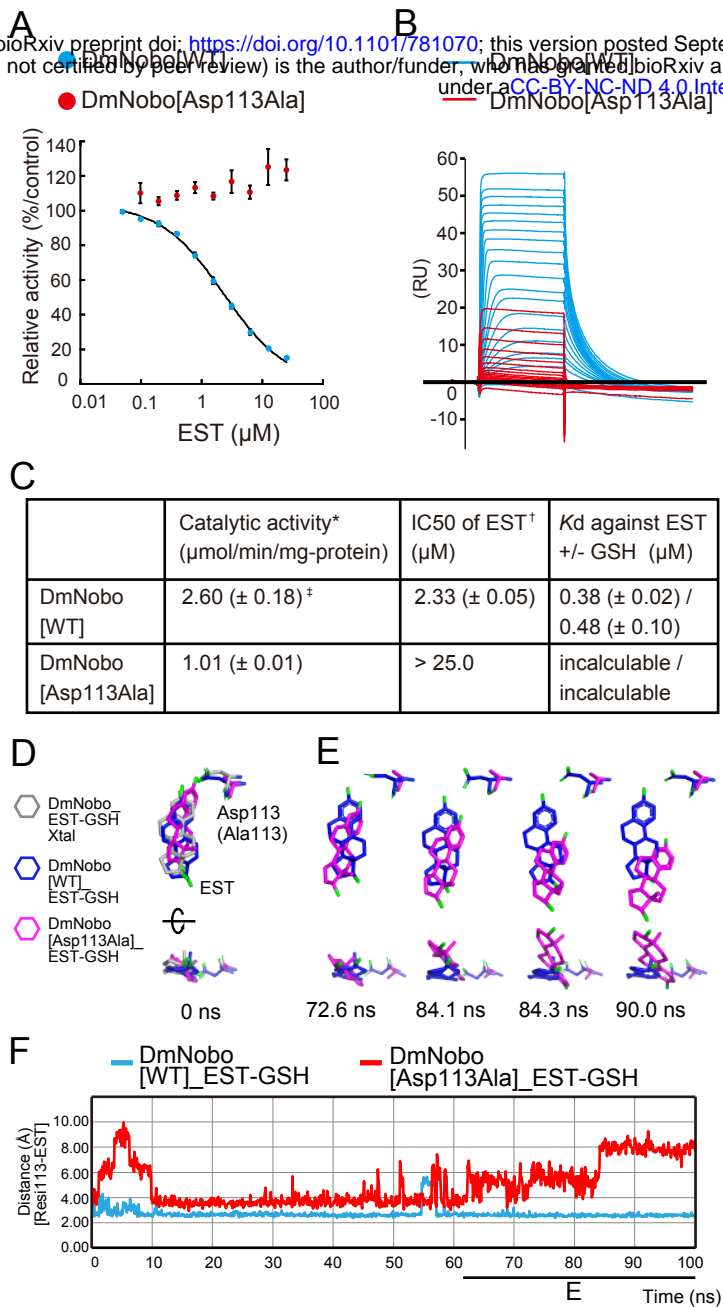

Figure 4 in vitro and in silico analyses for DmNobo[Asp113Ala]

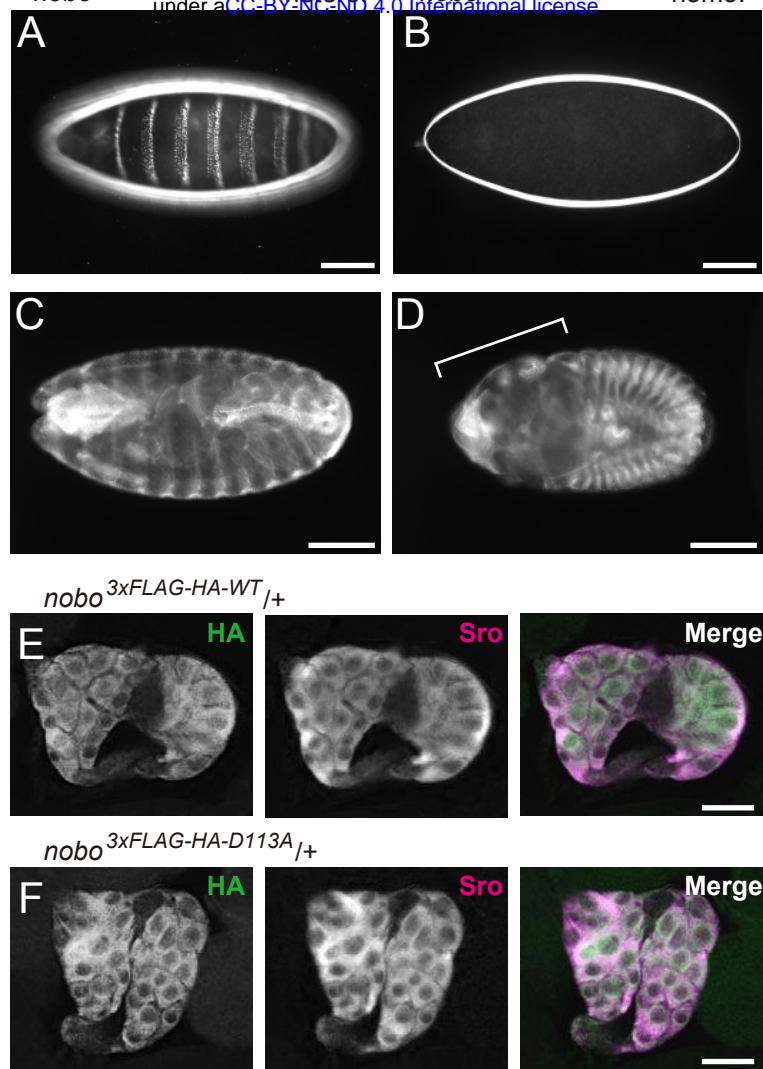

Figure 5. In vivo analysis of *DmNobo*[Asp113Ala] knock-in animals

Table 1. Viability of *nobo*<sup>3×FLAG-HA-D113A</sup>/*nobo*<sup>KO</sup> knock-in animals

| Background                | Knock-in gene                          | Mating<br><i>w</i> ; <i>nobo</i> <sup>KO</sup> /<br>CyO-GFP (female) × | Number of adults | Number of first instar larvae without GFP (with GFP) |
|---------------------------|----------------------------------------|------------------------------------------------------------------------|------------------|------------------------------------------------------|
| <i>nobo</i> <sup>KO</sup> | <i>nobo</i> <sup>3×FLAG-HA-WT</sup>    | <i>w</i> ; <i>nobo</i> <sup>3×FLAG-HA-WT</sup> /<br>CyO-GFP (male)     | 83 (172)         | N.D. †                                               |
|                           | <i>nobo</i> <sup>3×FLAG-HA-D113A</sup> | <i>w</i> ; <i>nobo</i> <sup>3×FLAG-HA-D113A</sup> /<br>CyO-GFP (male)  | 0 (187)          | 0 (157)                                              |

\* Cy- and Cy+ indicate animals with straight wings and curly wings, respectively.

† N.D. indicates “not determined”.
